# Supplementary material for: Transcriptome profiling at osmotic and ionic phases of salt stress response in bread wheat uncovers trait-specific candidate genes
Source: PubMed Central journal article supplement (PMC7493341; doi:10.1186/s12870-020-02616-9), 2020-09-16
Supplement: 12870_2020_2616_MOESM3_ESM.pdf [file 12870_2020_2616_MOESM3_ESM.pdf]

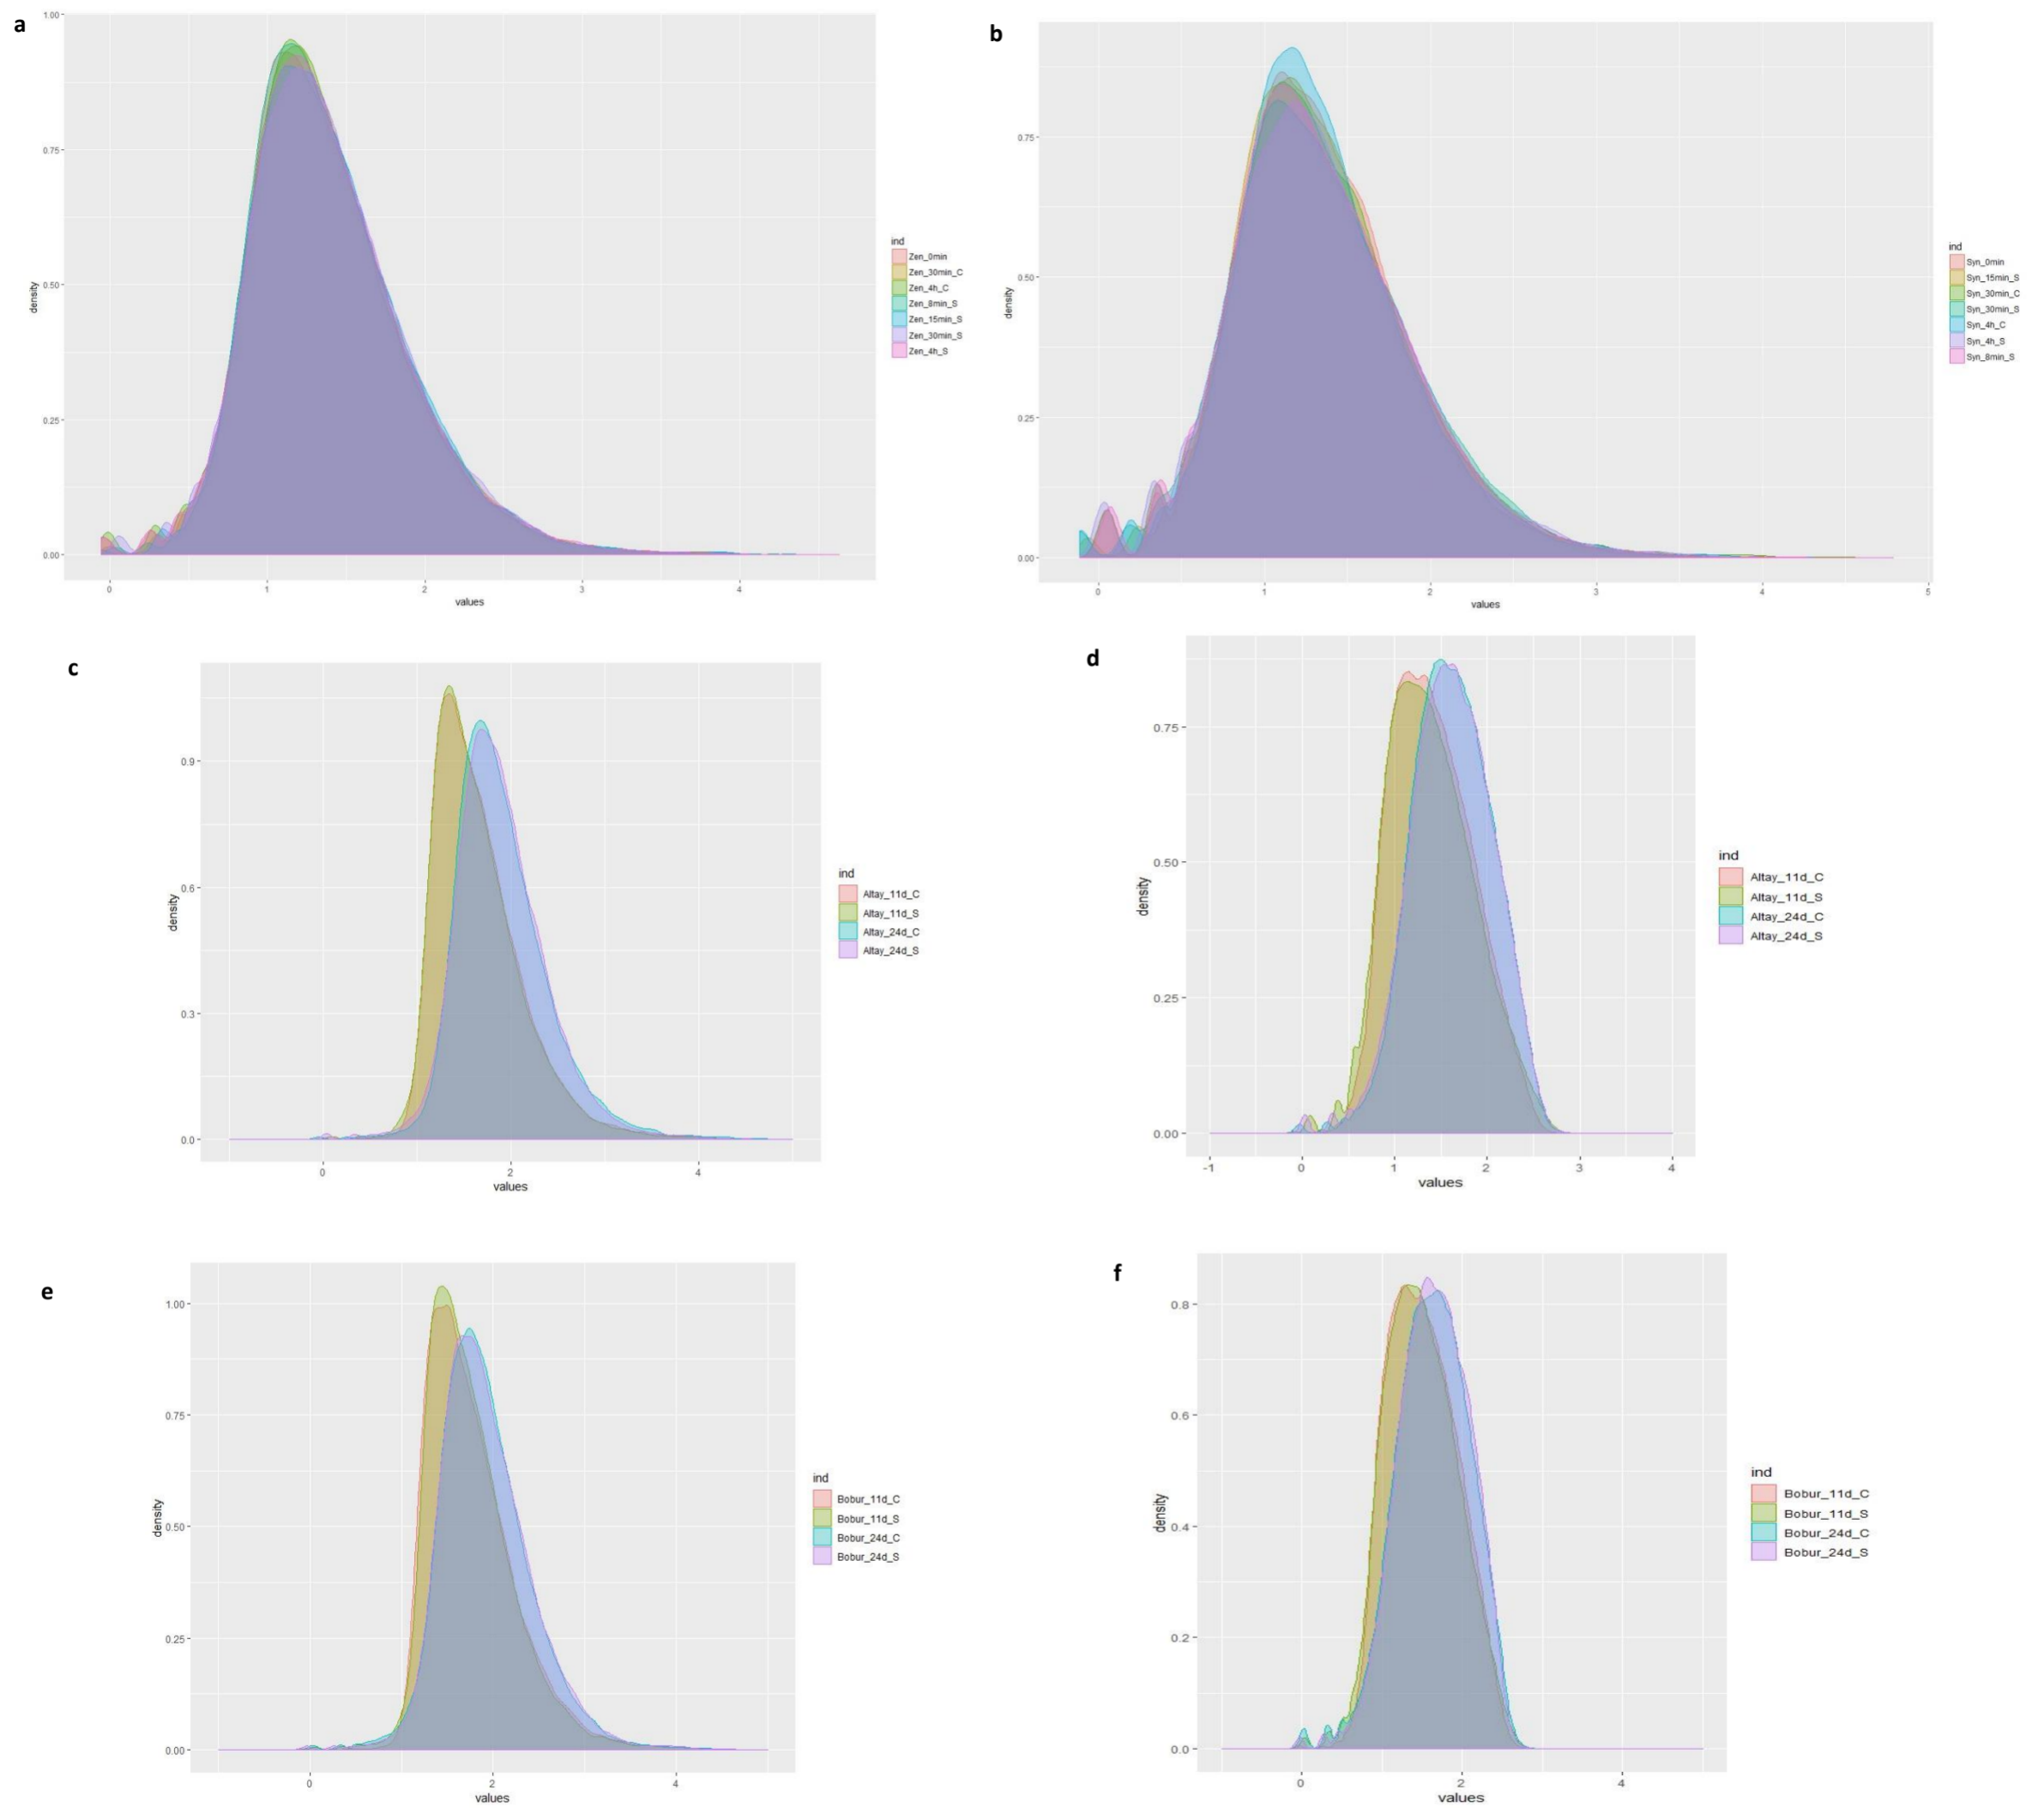

**Figure S1.** Density plots with the log<sub>10</sub> normalized expression values of the libraries from the four genotypes studied. a) Zentos, b) Syn86, c) Altay2000 without deduplication, d) Altay2000 deduplicated, e) Bobur without deduplication and f) Bobur deduplicated. C= Control library, S= Stress library.
