# Supplementary material for: Transcriptome profiling at osmotic and ionic phases of salt stress response in bread wheat uncovers trait-specific candidate genes
Source: PubMed Central journal article supplement (PMC7493341; doi:10.1186/s12870-020-02616-9), 2020-09-16
Supplement: 12870_2020_2616_MOESM8_ESM.pdf [file 12870_2020_2616_MOESM8_ESM.pdf]

**Table S5.** GO terms over-represented in the gene clusters from Syn86 and Zentos**a. Zentos****Profile 1**

| <b>Category ID</b> | <b>Category Name</b>                                         | <b>Genes Category</b> | <b>Genes Assigned</b> | <b>Corrected p-value</b> |
|--------------------|--------------------------------------------------------------|-----------------------|-----------------------|--------------------------|
| GO:0003700         | transcription factor activity, sequence-specific DNA binding | 492                   | 33                    | 0.00000025               |
| GO:0006869         | lipid transport                                              | 28                    | 9                     | 0.0000012                |
| GO:0004672         | protein kinase activity                                      | 1404                  | 57                    | 0.000027                 |
| GO:0006468         | protein phosphorylation                                      | 1407                  | 57                    | 0.000029                 |
| GO:0009415         | response to water                                            | 12                    | 6                     | 0.000033                 |
| GO:0005509         | calcium ion binding                                          | 432                   | 26                    | 0.00017                  |
| GO:0006355         | regulation of transcription, DNA-templated                   | 881                   | 39                    | 0.00057                  |

**Profile 2**

| <b>Category ID</b> | <b>Category Name</b>                                                                       | <b>Genes Category</b> | <b>Genes Assigned</b> | <b>Corrected p-value</b> |
|--------------------|--------------------------------------------------------------------------------------------|-----------------------|-----------------------|--------------------------|
| GO:0043565         | sequence-specific DNA binding                                                              | 318                   | 39                    | 1.5 <sup>-25</sup>       |
| GO:0003700         | transcription factor activity, sequence-specific DNA binding                               | 492                   | 46                    | 2.7 <sup>-25</sup>       |
| GO:0006355         | regulation of transcription, DNA-templated                                                 | 881                   | 56                    | 9 <sup>-23</sup>         |
| GO:0016702         | oxidoreductase activity, acting on single donors with incorporation of two atoms of oxygen | 38                    | 8                     | 0.0000088                |
| GO:0046872         | metal ion binding                                                                          | 512                   | 22                    | 0.00011                  |
| GO:0004601         | peroxidase activity                                                                        | 118                   | 10                    | 0.00097                  |

**Profile 3**

| <b>Category ID</b> | <b>Category Name</b>                         | <b>Genes Category</b> | <b>Genes Assigned</b> | <b>Corrected p-value</b> |
|--------------------|----------------------------------------------|-----------------------|-----------------------|--------------------------|
| GO:0048046         | apoplast                                     | 33                    | 14                    | 1.8 <sup>-16</sup>       |
| GO:0016762         | xyloglucan:xyloglucosyl transferase activity | 30                    | 13                    | 2.5 <sup>-15</sup>       |

|            |                                                              |      |    |                    |
|------------|--------------------------------------------------------------|------|----|--------------------|
| GO:0006073 | cellular glucan metabolic process                            | 30   | 13 | 2.5 <sup>-15</sup> |
| GO:0004553 | hydrolase activity, hydrolyzing O-glycosyl compounds         | 272  | 27 | 4.7 <sup>-15</sup> |
| GO:0005618 | cell wall                                                    | 34   | 13 | 1.9 <sup>-14</sup> |
| GO:0010411 | xyloglucan metabolic process                                 | 26   | 10 | 9.6 <sup>-11</sup> |
| GO:0005975 | carbohydrate metabolic process                               | 491  | 28 | 1.4 <sup>-9</sup>  |
| GO:0042546 | cell wall biogenesis                                         | 34   | 10 | 2.2 <sup>-9</sup>  |
| GO:0003700 | transcription factor activity, sequence-specific DNA binding | 492  | 23 | 0.0000067          |
| GO:0003677 | DNA binding                                                  | 1152 | 34 | 0.00018            |
| GO:0006355 | regulation of transcription, DNA-templated                   | 881  | 28 | 0.00055            |

#### Profile 4

| Category ID | Category Name                                                                                            | Genes Category | Genes Assigned | Corrected p-value  |
|-------------|----------------------------------------------------------------------------------------------------------|----------------|----------------|--------------------|
| GO:0050832  | defense response to fungus                                                                               | 11             | 8              | 1.9 <sup>-12</sup> |
| GO:0042742  | defense response to bacterium                                                                            | 11             | 8              | 1.9 <sup>-12</sup> |
| GO:0004332  | fructose-bisphosphate aldolase activity                                                                  | 19             | 6              | 0.0000051          |
| GO:0016998  | cell wall macromolecule catabolic process                                                                | 33             | 7              | 0.0000055          |
| GO:0006032  | chitin catabolic process                                                                                 | 33             | 7              | 0.0000055          |
| GO:0004568  | chitinase activity                                                                                       | 33             | 7              | 0.0000055          |
| GO:0016705  | oxidoreductase activity, acting on paired donors,<br>with incorporation or reduction of molecular oxygen | 251            | 14             | 0.000012           |
| GO:0005975  | carbohydrate metabolic process                                                                           | 491            | 19             | 0.000012           |
| GO:0055114  | oxidation-reduction process                                                                              | 1551           | 35             | 0.000016           |
| GO:0020037  | heme binding                                                                                             | 386            | 16             | 0.000069           |
| GO:0008061  | chitin binding                                                                                           | 18             | 5              | 0.00021            |
| GO:0005506  | iron ion binding                                                                                         | 317            | 14             | 0.00022            |

## Profile 5

| Category ID | Category Name                                | Genes Category | Genes Assigned | Corrected p-value |
|-------------|----------------------------------------------|----------------|----------------|-------------------|
| GO:0005576  | extracellular region                         | 51             | 10             | $7.7^{-12}$       |
| GO:0004867  | serine-type endopeptidase inhibitor activity | 23             | 6              | 0.00000034        |

## b. Syn86

### Profile 1

| Category ID | Category Name                                                                              | Genes Category | Genes Assigned | Corrected p-value |
|-------------|--------------------------------------------------------------------------------------------|----------------|----------------|-------------------|
| GO:0015979  | photosynthesis                                                                             | 136            | 82             | $5.5^{-62}$       |
| GO:0009523  | photosystem II                                                                             | 81             | 44             | $1^{-29}$         |
| GO:0009522  | photosystem I                                                                              | 33             | 27             | $4.4^{-25}$       |
| GO:0055114  | oxidation-reduction process                                                                | 1652           | 205            | $1.8^{-21}$       |
| GO:0009654  | photosystem II oxygen evolving complex                                                     | 64             | 31             | $1.7^{-18}$       |
| GO:0009538  | photosystem I reaction center                                                              | 16             | 15             | $5.3^{-15}$       |
| GO:0019898  | extrinsic component of membrane                                                            | 52             | 25             | $1.7^{-14}$       |
| GO:0006869  | lipid transport                                                                            | 25             | 15             | $6.5^{-10}$       |
| GO:0048046  | apoplast                                                                                   | 39             | 17             | 0.000000018       |
| GO:0016655  | oxidoreductase activity, acting on NAD(P)H, quinone or similar compound as acceptor        | 12             | 10             | 0.00000003        |
| GO:0016747  | transferase activity, transferring acyl groups other than amino-acyl groups                | 154            | 33             | 0.000000087       |
| GO:0015995  | chlorophyll biosynthetic process                                                           | 20             | 12             | 0.00000014        |
| GO:0005975  | carbohydrate metabolic process                                                             | 513            | 69             | 0.00000016        |
| GO:0016760  | cellulose synthase (UDP-forming) activity                                                  | 46             | 17             | 0.00000041        |
| GO:0008152  | metabolic process                                                                          | 1043           | 112            | 0.00000071        |
| GO:0016702  | oxidoreductase activity, acting on single donors with incorporation of two atoms of oxygen | 48             | 17             | 0.00000088        |
| GO:0016762  | xyloglucan:xyloglucosyl transferase activity                                               | 37             | 15             | 0.00000095        |

|            |                                        |      |     |            |
|------------|----------------------------------------|------|-----|------------|
| GO:0006073 | cellular glucan metabolic process      | 37   | 15  | 0.00000095 |
| GO:0005840 | ribosome                               | 606  | 74  | 0.0000029  |
| GO:0016491 | oxidoreductase activity                | 957  | 103 | 0.000003   |
| GO:0005618 | cell wall                              | 41   | 15  | 0.0000051  |
| GO:0020037 | heme binding                           | 435  | 58  | 0.0000063  |
| GO:0030244 | cellulose biosynthetic process         | 56   | 17  | 0.000013   |
| GO:0006412 | translation                            | 630  | 74  | 0.000015   |
| GO:0010411 | xyloglucan metabolic process           | 33   | 13  | 0.000019   |
| GO:0005506 | iron ion binding                       | 374  | 50  | 0.000062   |
| GO:0003735 | structural constituent of ribosome     | 630  | 71  | 0.00015    |
| GO:0008289 | lipid binding                          | 74   | 18  | 0.00021    |
| GO:0008171 | O-methyltransferase activity           | 35   | 12  | 0.0004     |
| GO:0042546 | cell wall biogenesis                   | 42   | 13  | 0.00051    |
| GO:0010333 | terpene synthase activity              | 31   | 11  | 0.00083    |
| GO:0016020 | membrane                               | 1269 | 117 | 0.001      |
| GO:0015986 | ATP synthesis coupled proton transport | 45   | 13  | 0.001      |

## Profile 2

| Category ID | Category Name                                                | Genes Category | Genes Assigned | Corrected p-value  |
|-------------|--------------------------------------------------------------|----------------|----------------|--------------------|
| GO:0003735  | structural constituent of ribosome                           | 630            | 170            | 1 <sup>-90</sup>   |
| GO:0005840  | ribosome                                                     | 606            | 165            | 1.4 <sup>-88</sup> |
| GO:0006412  | translation                                                  | 630            | 166            | 1.1 <sup>-86</sup> |
| GO:0005622  | intracellular                                                | 709            | 128            | 9.1 <sup>-46</sup> |
| GO:0016998  | cell wall macromolecule catabolic process                    | 38             | 19             | 2.6 <sup>-14</sup> |
| GO:0006032  | chitin catabolic process                                     | 38             | 19             | 2.6 <sup>-14</sup> |
| GO:0004568  | chitinase activity                                           | 38             | 19             | 2.6 <sup>-14</sup> |
| GO:0020037  | heme binding                                                 | 435            | 58             | 3.5 <sup>-13</sup> |
| GO:0015935  | small ribosomal subunit                                      | 51             | 18             | 3.2 <sup>-10</sup> |
| GO:0003700  | transcription factor activity, sequence-specific DNA binding | 536            | 58             | 3.1 <sup>-9</sup>  |

|            |                                                                                            |      |     |             |
|------------|--------------------------------------------------------------------------------------------|------|-----|-------------|
| GO:0015934 | large ribosomal subunit                                                                    | 48   | 16  | 0.000000018 |
| GO:0043565 | sequence-specific DNA binding                                                              | 346  | 43  | 0.000000024 |
| GO:0006414 | translational elongation                                                                   | 59   | 17  | 0.000000059 |
| GO:0004672 | protein kinase activity                                                                    | 1471 | 107 | 0.00000047  |
| GO:0006468 | protein phosphorylation                                                                    | 1473 | 107 | 0.00000051  |
| GO:0008061 | chitin binding                                                                             | 19   | 10  | 0.00000052  |
| GO:0006979 | response to oxidative stress                                                               | 137  | 24  | 0.00000066  |
| GO:0004867 | serine-type endopeptidase inhibitor activity                                               | 44   | 14  | 0.00000067  |
| GO:0009611 | response to wounding                                                                       | 20   | 10  | 0.000001    |
| GO:0004601 | peroxidase activity                                                                        | 124  | 22  | 0.0000026   |
| GO:0005975 | carbohydrate metabolic process                                                             | 513  | 50  | 0.0000035   |
| GO:0016705 | oxidoreductase activity, acting on single donors with incorporation of two atoms of oxygen | 295  | 33  | 0.000065    |
| GO:0003746 | translation elongation factor activity                                                     | 55   | 13  | 0.00014     |
| GO:0010333 | terpene synthase activity                                                                  | 31   | 10  | 0.00016     |
| GO:0016758 | transferase activity, transferring hexosyl groups                                          | 148  | 21  | 0.00032     |
| GO:0004553 | hydrolase activity, hydrolyzing O-glycosyl compounds                                       | 286  | 31  | 0.00033     |
| GO:0006952 | defense response                                                                           | 34   | 10  | 0.00043     |
| GO:0048544 | recognition of pollen                                                                      | 54   | 12  | 0.00088     |

### Profile 3

| Category ID | Category Name                                   | Genes Category | Genes Assigned | Corrected p-value  |
|-------------|-------------------------------------------------|----------------|----------------|--------------------|
| GO:0008152  | metabolic process                               | 1043           | 78             | 2.7 <sup>-13</sup> |
| GO:0003824  | catalytic activity                              | 1463           | 91             | 5.8 <sup>-11</sup> |
| GO:0009415  | response to water                               | 19             | 9              | 0.00000046         |
| GO:0004867  | serine-type endopeptidase inhibitor activity    | 44             | 12             | 0.0000011          |
| GO:0055114  | oxidation-reduction process                     | 1652           | 87             | 0.0000011          |
| GO:0004350  | glutamate-5-semialdehyde dehydrogenase activity | 5              | 5              | 0.000013           |
| GO:0016491  | oxidoreductase activity                         | 957            | 57             | 0.000016           |

|            |                             |     |    |          |
|------------|-----------------------------|-----|----|----------|
| GO:0043169 | cation binding              | 97  | 15 | 0.000042 |
| GO:0006950 | response to stress          | 143 | 17 | 0.00028  |
| GO:0030170 | pyridoxal phosphate binding | 141 | 16 | 0.001    |

#### Profile 4

| Category ID | Category Name                              | Genes Category | Genes Assigned | Corrected p-value |
|-------------|--------------------------------------------|----------------|----------------|-------------------|
| GO:0055085  | transmembrane transport                    | 669            | 52             | 1.2 <sup>-9</sup> |
| GO:0004014  | adenosylmethionine decarboxylase activity  | 5              | 5              | 0.00001           |
| GO:0006597  | spermine biosynthetic process              | 5              | 5              | 0.00001           |
| GO:0006814  | sodium ion transport                       | 25             | 8              | 0.00012           |
| GO:0008295  | spermidine biosynthetic process            | 8              | 5              | 0.00054           |
| GO:0006355  | regulation of transcription, DNA-templated | 919            | 49             | 0.001             |

#### Profile 5

| Category ID | Category Name                                                      | Genes Category | Genes Assigned | Corrected p-value  |
|-------------|--------------------------------------------------------------------|----------------|----------------|--------------------|
| GO:0045735  | nutrient reservoir activity                                        | 35             | 17             | 2.8 <sup>-19</sup> |
| GO:0030145  | manganese ion binding                                              | 46             | 17             | 9.4 <sup>-17</sup> |
| GO:0000786  | nucleosome<br>transcription factor activity, sequence-specific DNA | 121            | 17             | 4.2 <sup>-9</sup>  |
| GO:0003700  | binding                                                            | 536            | 31             | 0.00000024         |
| GO:0003677  | DNA binding                                                        | 1139           | 47             | 0.0000006          |
| GO:0006334  | nucleosome assembly                                                | 64             | 11             | 0.0000029          |
| GO:0006355  | regulation of transcription, DNA-templated                         | 919            | 36             | 0.00023            |
