# Supplementary material for: Transcriptome profiling at osmotic and ionic phases of salt stress response in bread wheat uncovers trait-specific candidate genes
Source: PubMed Central journal article supplement (PMC7493341; doi:10.1186/s12870-020-02616-9), 2020-09-16
Supplement: 12870_2020_2616_MOESM10_ESM.pdf [file 12870_2020_2616_MOESM10_ESM.pdf]

**Table S6.** RT-qPCR primers of target genes and amplification efficiency assessment with the reference genes *Ef1.1* and *Ef1.2* (Oyiga *et al.*, 2018, 2019).

| Gene                      | Forward 5'-3'            | Reverse 5'-3'             | Amplicon size (bp) | Efficiency (slope) |              |
|---------------------------|--------------------------|---------------------------|--------------------|--------------------|--------------|
|                           |                          |                           |                    | <i>Ef1.1</i>       | <i>Ef1.2</i> |
| <i>TraesCS2D02G173600</i> | TCTGCTGTGCTATGCTCGAC     | TCCCGTTCTGTCCGAATTCTA     | 250                | -0.1038            | 0.0432       |
| <i>TraesCS5D02G238700</i> | TCGTTTGTTTCGTTTGTTCGTTTG | GTATAAAGAATAGGATTGGATAACA | 110                | -0.043             | -0.167       |
