# Supplementary material for: Transcriptome profiling at osmotic and ionic phases of salt stress response in bread wheat uncovers trait-specific candidate genes
Source: PubMed Central journal article supplement (PMC7493341; doi:10.1186/s12870-020-02616-9), 2020-09-16

**Figure S3.** Melting curves of some PCR products derived from the amplification of reference and target genes.

**a) *TraesCS2D02G173600***

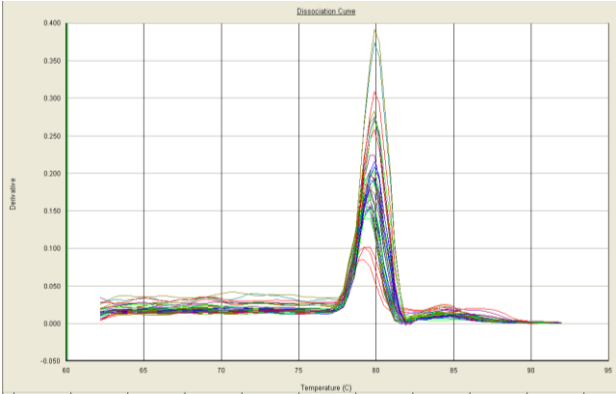

**b) *TraesCS5D02G238700***

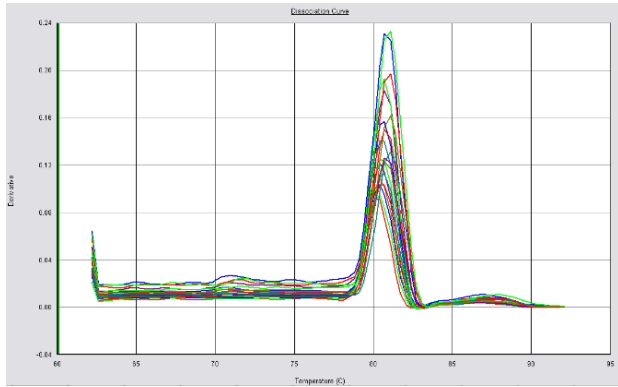

**c) *Ef1.1***

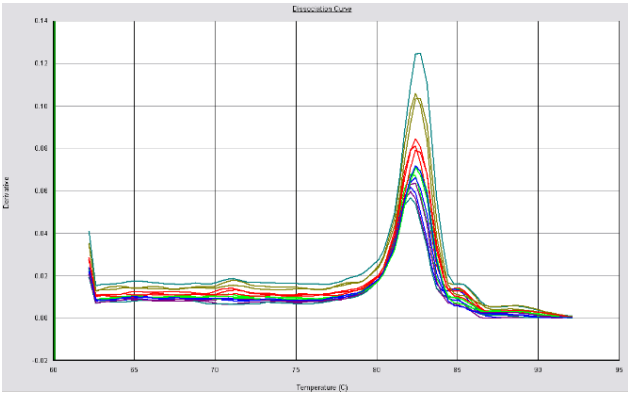

**d) *Ef1.2***

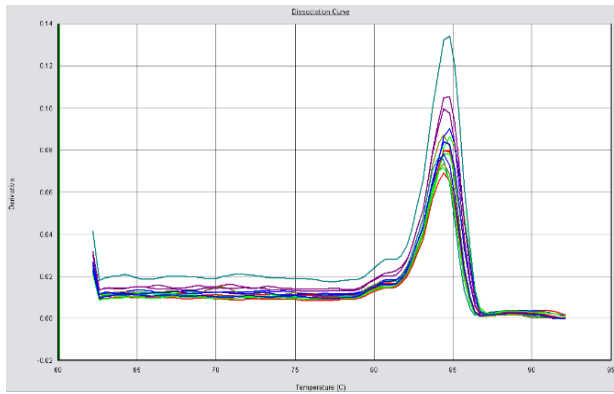

Supplement: 12870_2020_2616_MOESM11_ESM.pdf [file 12870_2020_2616_MOESM11_ESM.pdf]
