# Supplementary material for: Transcriptome profiling at osmotic and ionic phases of salt stress response in bread wheat uncovers trait-specific candidate genes
Source: PubMed Central journal article supplement (PMC7493341; doi:10.1186/s12870-020-02616-9), 2020-09-16
Supplement: 12870_2020_2616_MOESM12_ESM.pdf [file 12870_2020_2616_MOESM12_ESM.pdf]

*TraesCS5D02G238700*

*TraesCS2D02G173600*

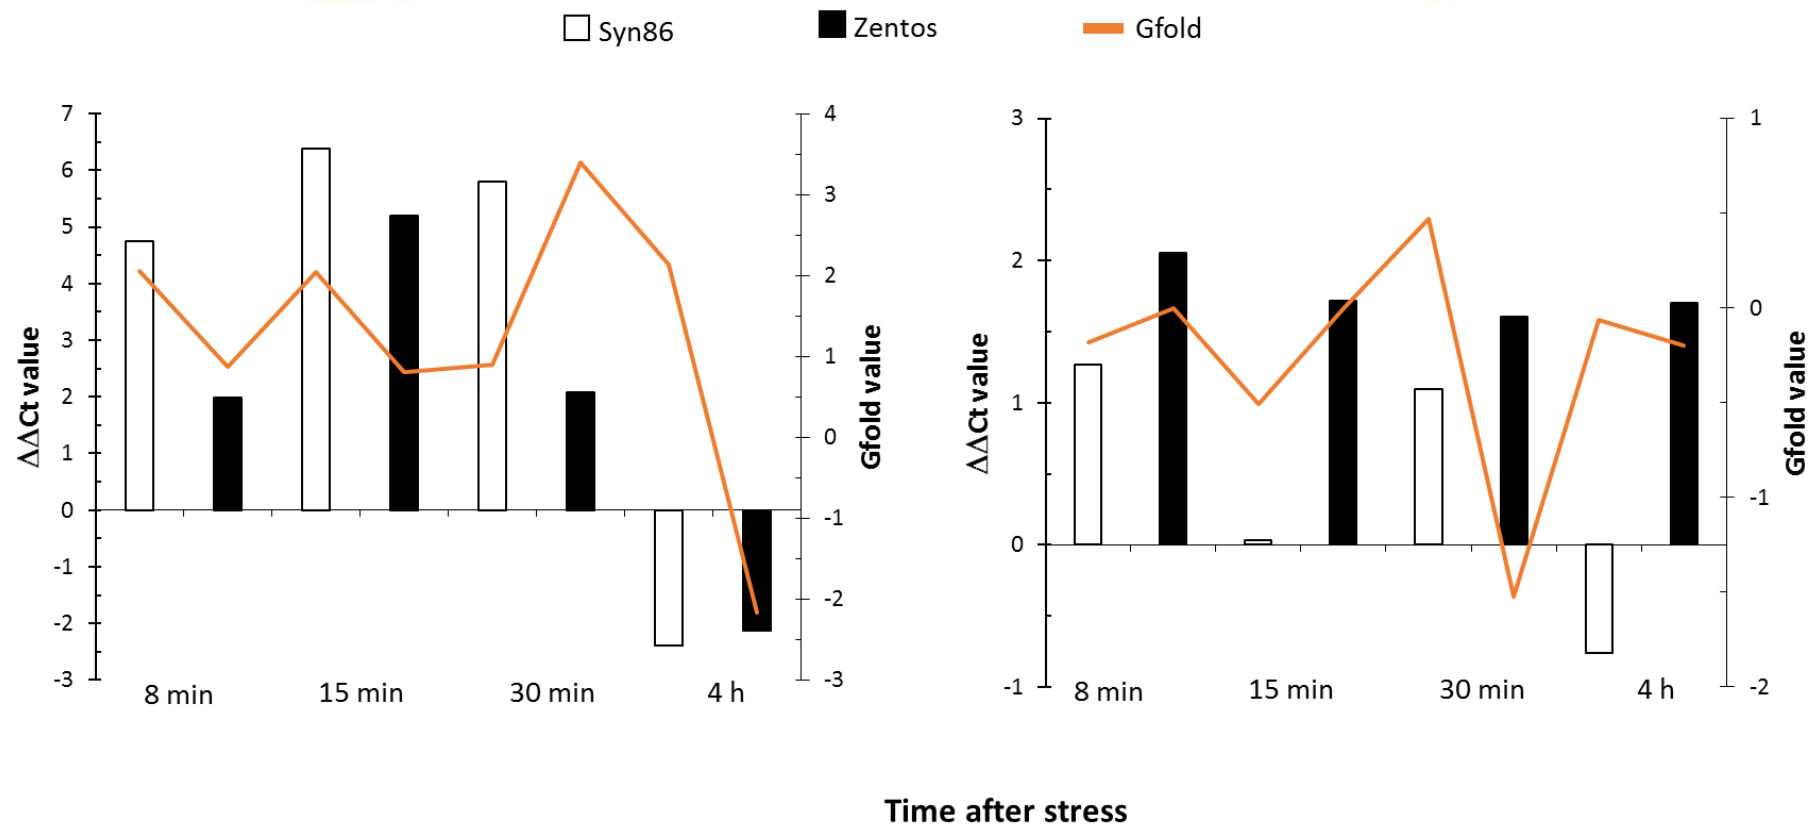

**Fig. S4.** Comparison of GFOLD values and  $\Delta\Delta Ct$  values of *TraesCS5D02G238700* and *TraesCS2D02G173600* in Syn86 and Zentos.
